# Supplementary material for: Synthesis of Calamitic Fluorinated Mesogens with Complex Crystallization Behavior
Source: MDPI journal article supplement (doi:10.3390/molecules28248002), 2023-12-08
Supplement: s1 [file s1]

# Synthesis of Calamitic Fluorinated Mesogens with Complex Crystallization Behavior

Denis Anokhin <sup>1,2,\*</sup>, Alina Maryasevskaya <sup>1</sup>, Ainur Abukaev <sup>1</sup>, Umut Ugur Ozkose <sup>3,4</sup>, Alexander Buglakov <sup>1,5</sup>, Dimitri A. Ivanov <sup>1,2,6</sup> and Bruno Améduri <sup>1,3,\*</sup>

<sup>1</sup> Faculty of Chemistry, Lomonosov Moscow State University, GSP-1, 1-3 Leninskiye Gory, 119991 Moscow, Russia; ainurabukaev@gmail.com (A.A.);

buglakov@polly.phys.msu.ru (A.B.); dimitri.ivanov@uha.fr (D.A.I.)

<sup>2</sup> Scientific Center for Genetics and Life Sciences, Sirius University of Science and Technology, 1 Olympic Ave., 354340 Sochi, Russia

<sup>3</sup> Institut Charles Gerhardt, CNRS, University of Montpellier, Ecole Nationale Supérieure de Chimie de Montpellier, 34000 Montpellier, France; umut-ugur.ozkose@umontpellier.fr

<sup>4</sup> Department of Chemistry, Faculty of Science and Letters, Piri Reis University, Tuzla, 34940 Istanbul, Turkey

<sup>5</sup> A. N. Nesmeyanov Institute of Organoelement Compounds RAS, Vavilova ul., 28, 119334 Moscow, Russia

<sup>6</sup> Institut de Sciences des Matériaux de Mulhouse-IS2M, CNRS UMR 7361, Jean Starcky 15, 68057 Mulhouse, France

\* Correspondence: deniano@yahoo.com (D.A.); bruno.ameduri@enscm.fr (B.A.);

Tel.: +33-(0)4-48-79-2020 (B.A.)

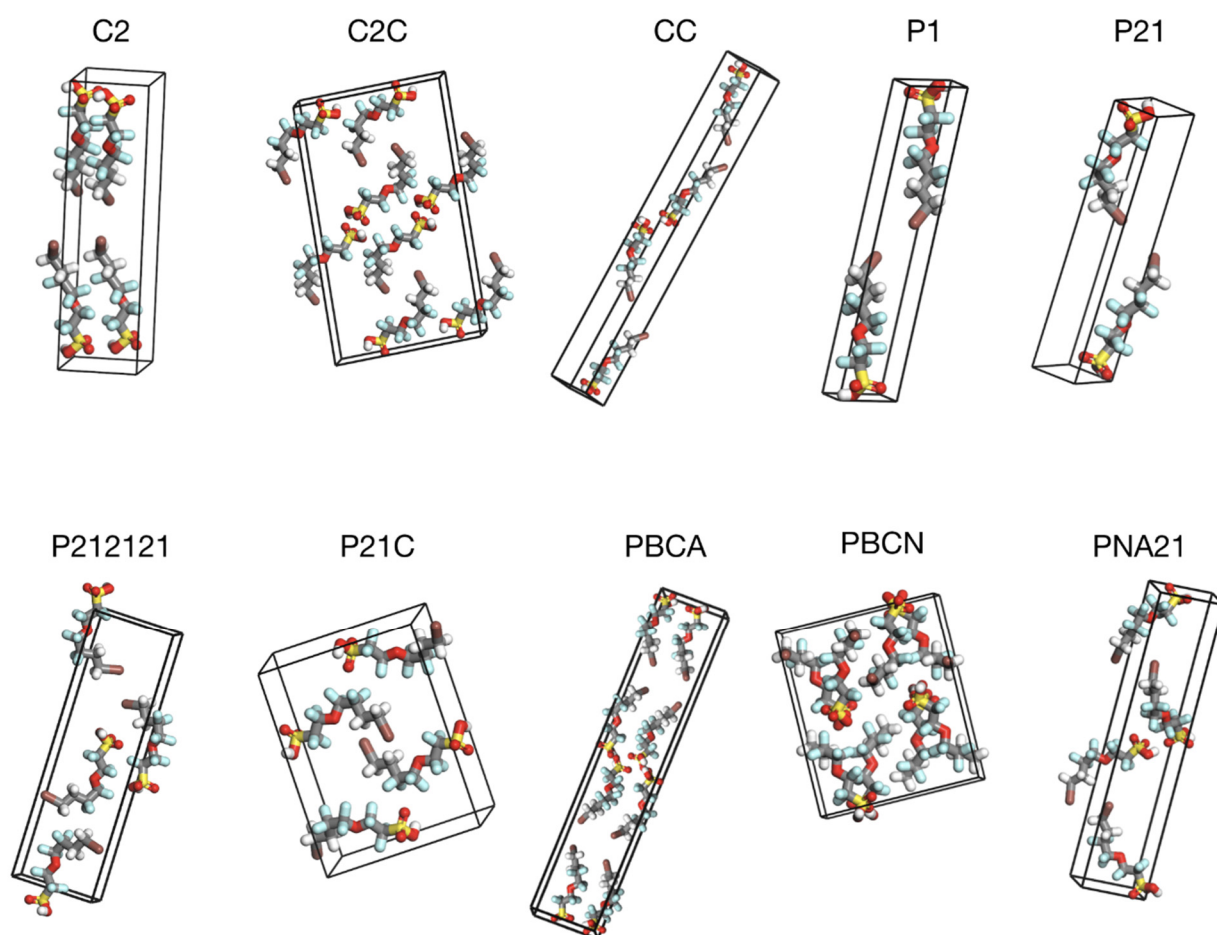

Figure S1: Possible symmetries of unit cell of  $\text{ICH}_2\text{CH}_2\text{CF}_2\text{CF}_2\text{OCF}_2\text{CF}_2\text{SO}_3\text{H}$  used in simulation.

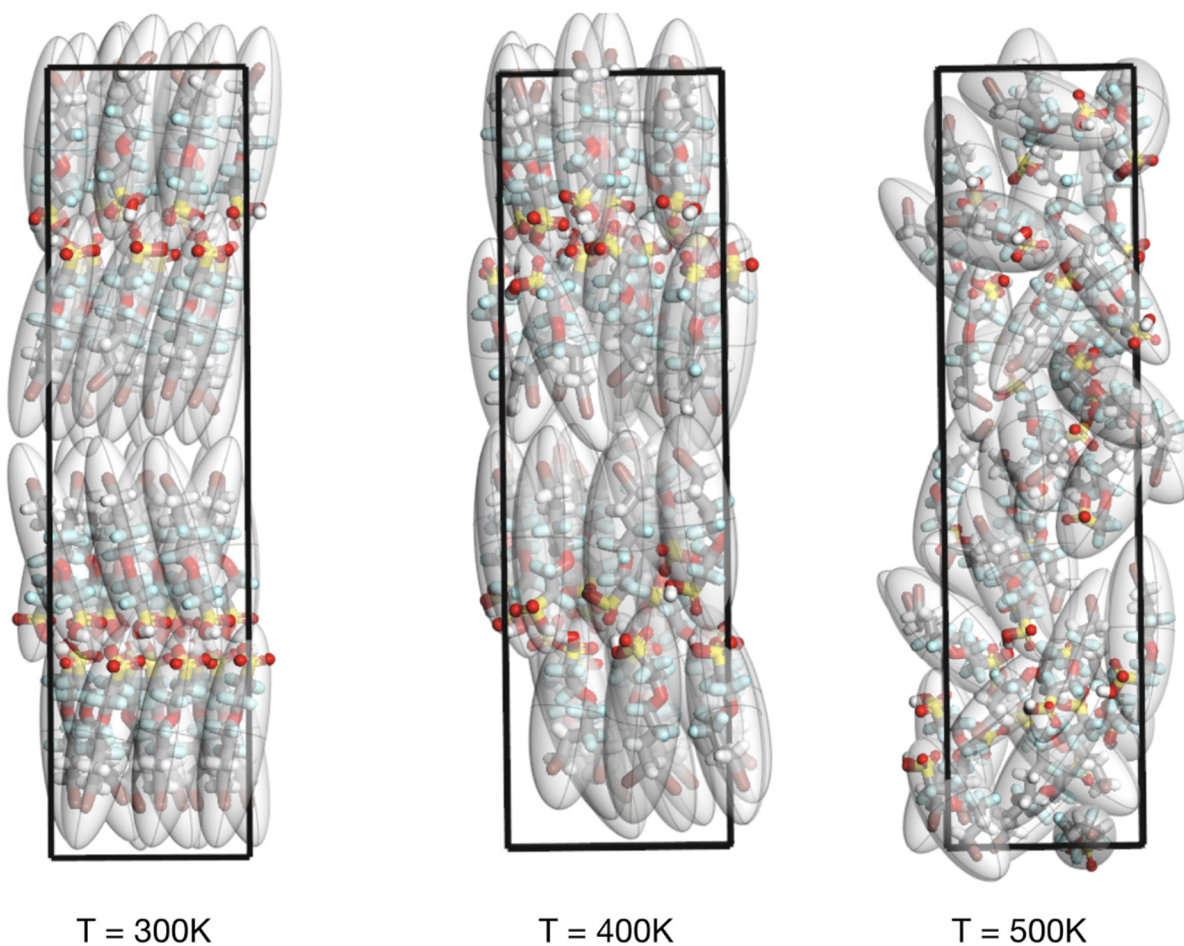

Figure S2: Model of P1 unit cell of  $\text{ICH}_2\text{CH}_2\text{CF}_2\text{CF}_2\text{OCF}_2\text{CF}_2\text{SO}_3\text{H}$  at different temperatures.

Table S1: Experimental and theoretical peak positions for ICH<sub>2</sub>CH<sub>2</sub>CF<sub>2</sub>CF<sub>2</sub>OCF<sub>2</sub>CF<sub>2</sub>SO<sub>3</sub>H at room temperature.

| $h$ | $k$ | $l$ | $d_{exp}$ | $d_{calc}$ |
|-----|-----|-----|-----------|------------|
| 1   | 0   | 0   | 27.54     | 27.50      |
| 2   | 0   | 0   | 13.78     | 13.80      |
| 3   | 0   | 0   | 9.17      | 9.18       |
| 0   | 1   | 0   | 5.21      | 5.16       |
| 1   | 1   | 0   | 5.04      | 5.08       |
| 0   | 0   | 1   | 4.96      | 4.97       |
| 1   | 0   | 1   | 4.87      | 4.89       |
| 2   | 0   | -1  | 4.75      | 4.67       |
| 6   | 0   | 0   | 4.57      | 4.59       |
| 3   | 0   | 1   | 4.39      | 4.37       |
| 4   | -1  | 0   | 4.14      | 4.13       |
| 4   | 0   | 1   | 3.99      | 4.03       |
| 2   | 1   | 1   | 3.72      | 3.74       |
| 5   | 0   | 1   | 3.65      | 3.69       |
| 8   | 0   | 0   | 3.47      | 3.44       |
| 2   | 1   | -1  | 3.21      | 3.24       |
| 4   | 1   | 1   | 3.39      | 3.38       |
| 1   | -1  | 1   | 3.31      | 3.34       |
| 2   | -1  | 1   | 3.21      | 3.24       |
| 3   | -1  | 1   | 3.12      | 3.14       |
| 7   | 0   | 1   | 3.05      | 3.08       |
| 6   | 1   | 1   | 2.93      | 2.97       |
| 6   | 1   | -1  | 2.67      | 2.70       |
| 1   | 2   | 0   | 2.56      | 2.57       |
| 2   | 2   | 0   | 2.51      | 2.54       |
| 1   | 1   | 2   | 2.36      | 2.38       |
| 4   | 0   | 2   | 2.32      | 2.34       |
| 5   | 0   | 2   | 2.27      | 2.26       |
| 6   | 0   | 2   | 2.18      | 2.18       |
| 8   | 2   | 0   | 2.06      | 2.07       |
| 8   | 0   | 2   | 2.02      | 2.01       |
| 3   | 2   | 2   | 1.90      | 1.90       |
| 4   | 2   | 2   | 1.86      | 1.86       |
| 5   | 2   | 2   | 1.82      | 1.83       |
| 6   | 2   | 2   | 1.78      | 1.79       |
| 0   | 3   | 0   | 1.72      | 1.72       |
| 0   | 2   | -2  | 1.68      | 1.67       |
| 3   | 2   | -2  | 1.64      | 1.64       |

Figure S3: structure of di(*tert*-butylcyclohexylperoxy dicarbonate

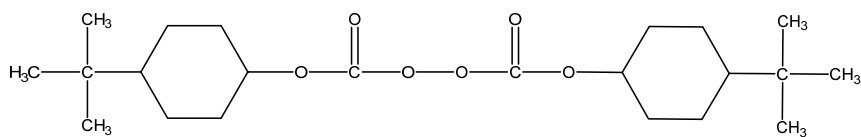

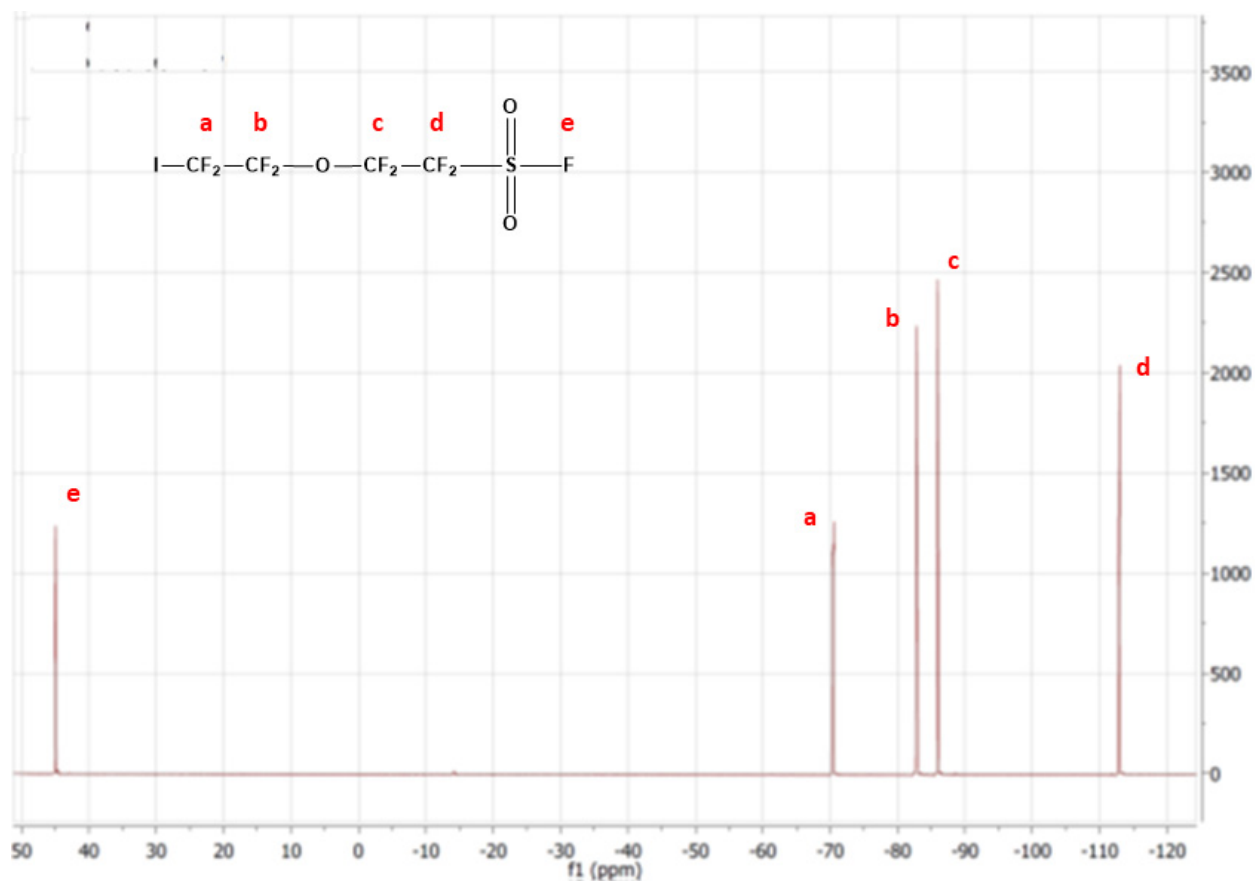

Figure S4:  $^{19}\text{F}$ -NMR spectrum of  $\text{ICF}_2\text{CF}_2\text{OCF}_2\text{CF}_2\text{SO}_2\text{F}$  recorded in  $d_6$ -acetone.

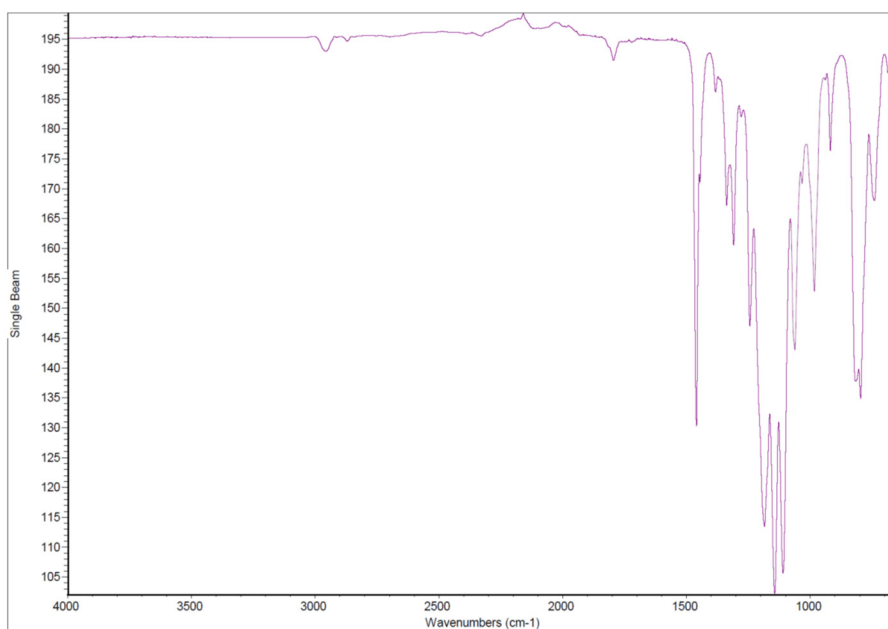

Figure S5: FT-IR spectrum of  $\text{ICH}_2\text{CH}_2\text{CF}_2\text{CF}_2\text{OCF}_2\text{CF}_2\text{SO}_2\text{F}$

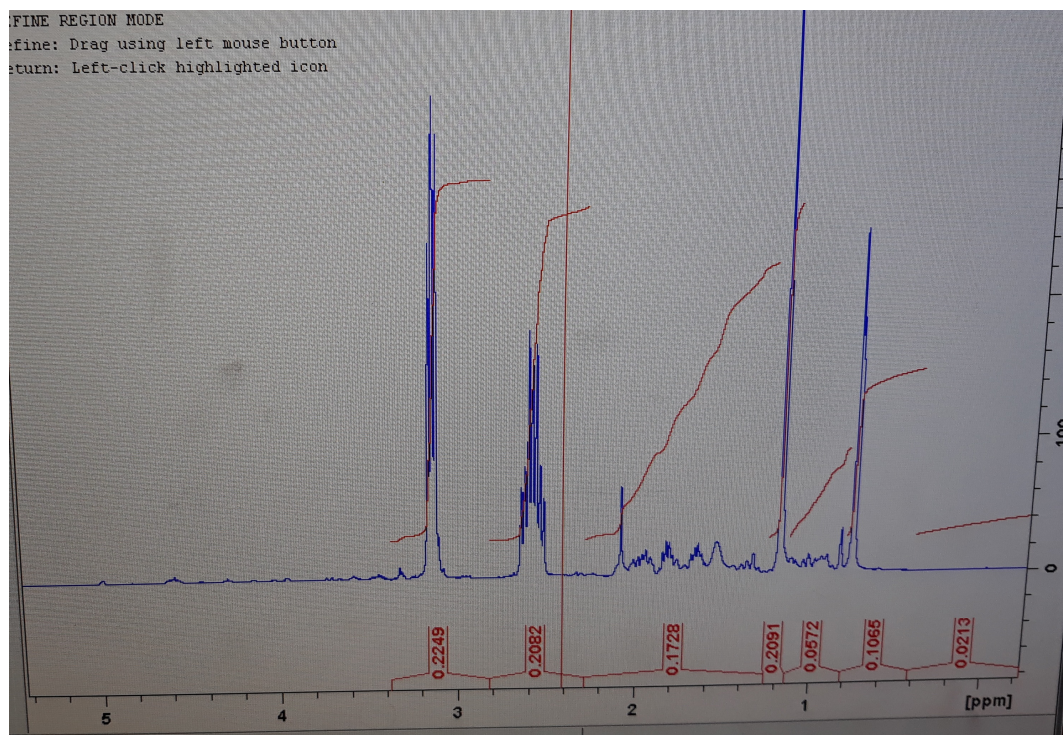

Figure S6:  $^1\text{H}$ -NMR spectrum of  $\text{ICH}_2\text{CH}_2\text{CF}_2\text{CF}_2\text{OCF}_2\text{CF}_2\text{SO}_2\text{F}$  recorded in  $\text{d}_6$ -acetone.

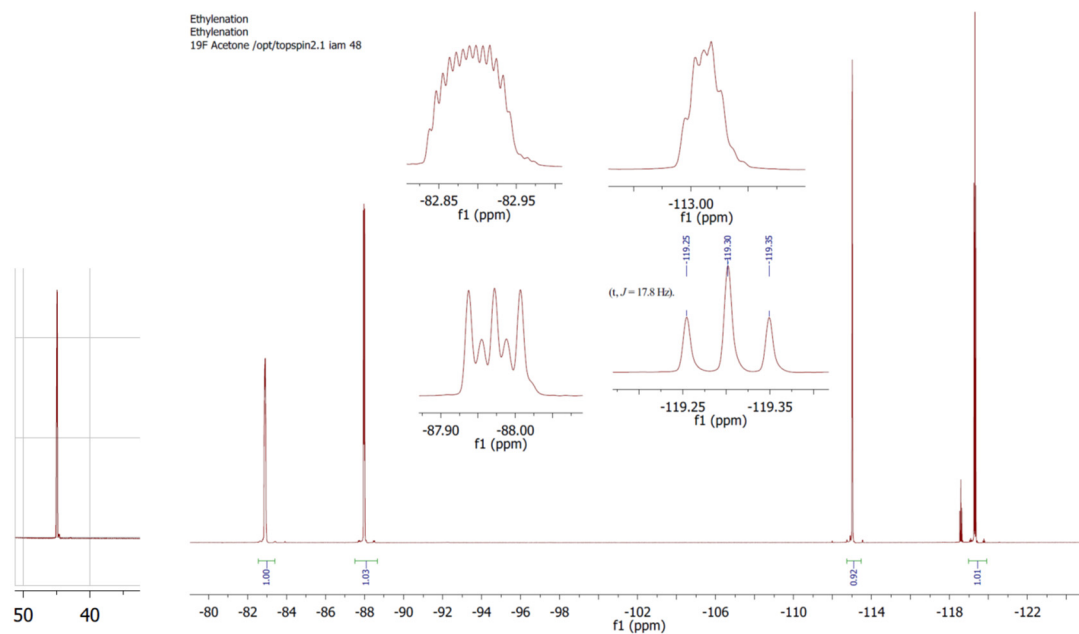

Figure S7  $^{19}\text{F}$  NMR spectrum of  $\text{I-CH}_2\text{CH}_2\text{-C}_2\text{F}_4\text{-O-C}_2\text{F}_4\text{-SO}_2\text{F}$  in  $\text{d}_6$ -acetone



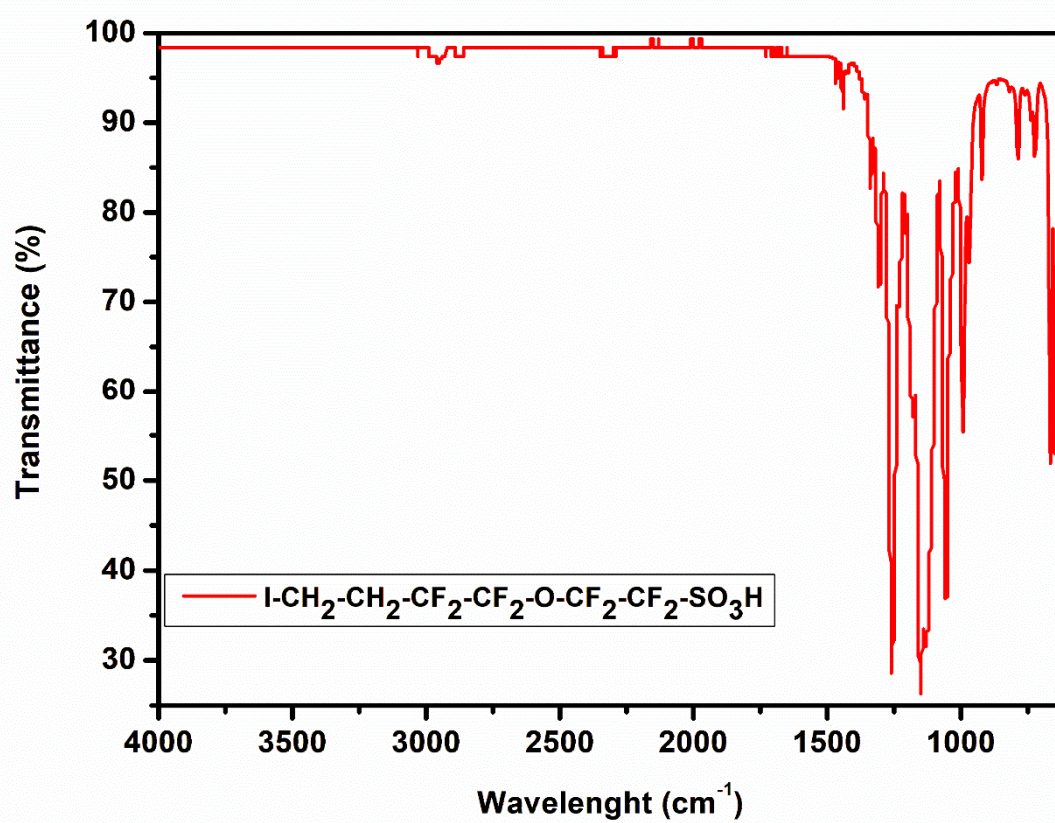

Figure S8: FT-IR spectrum of ICH<sub>2</sub>CH<sub>2</sub>CF<sub>2</sub>CF<sub>2</sub>OCF<sub>2</sub>CF<sub>2</sub>SO<sub>3</sub>H.

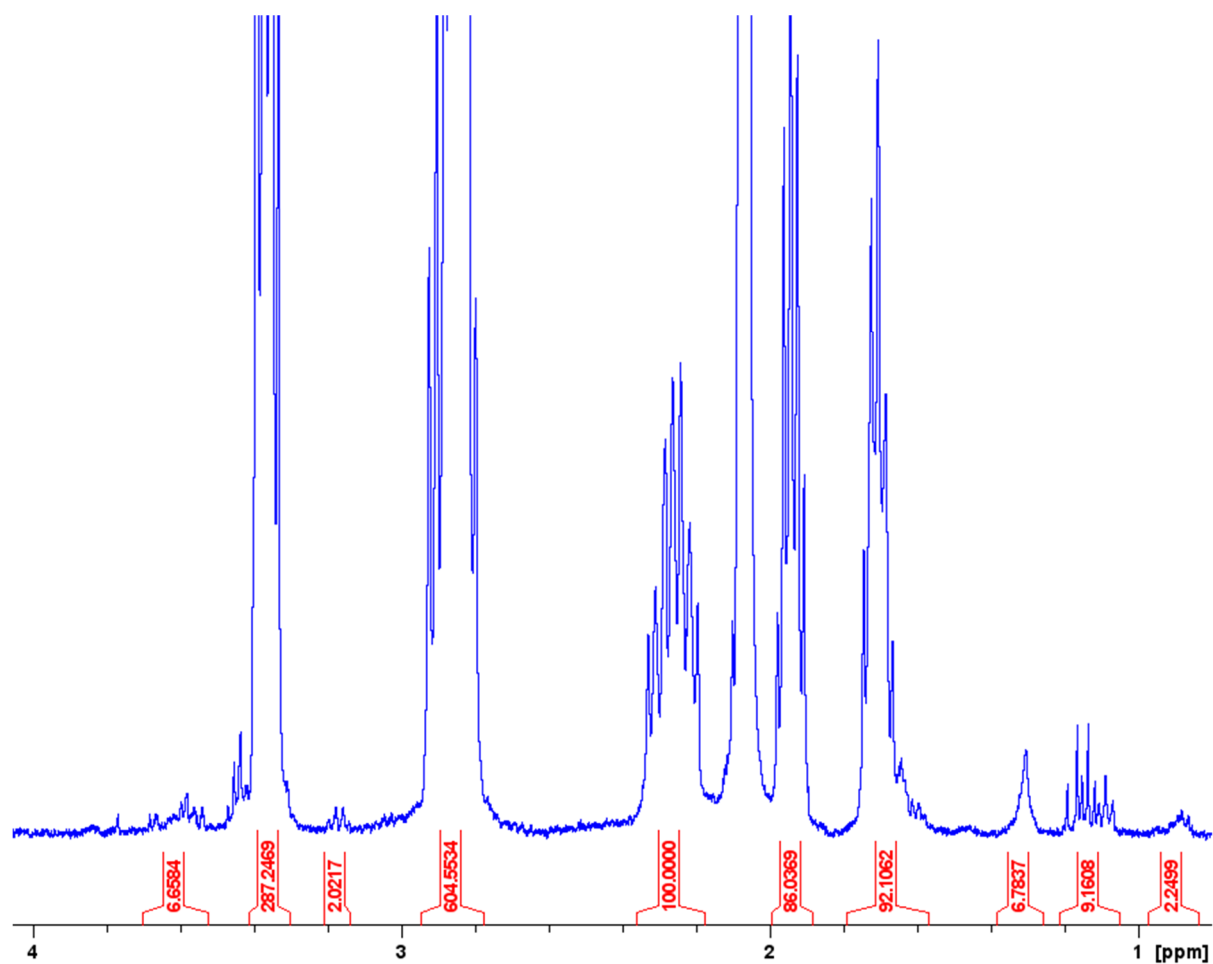

Figure S9: <sup>1</sup>H-NMR spectrum of ICH<sub>2</sub>CH<sub>2</sub>CF<sub>2</sub>CF<sub>2</sub>OCF<sub>2</sub>CF<sub>2</sub>SO<sub>3</sub>H recorded in d<sub>6</sub>-acetone.

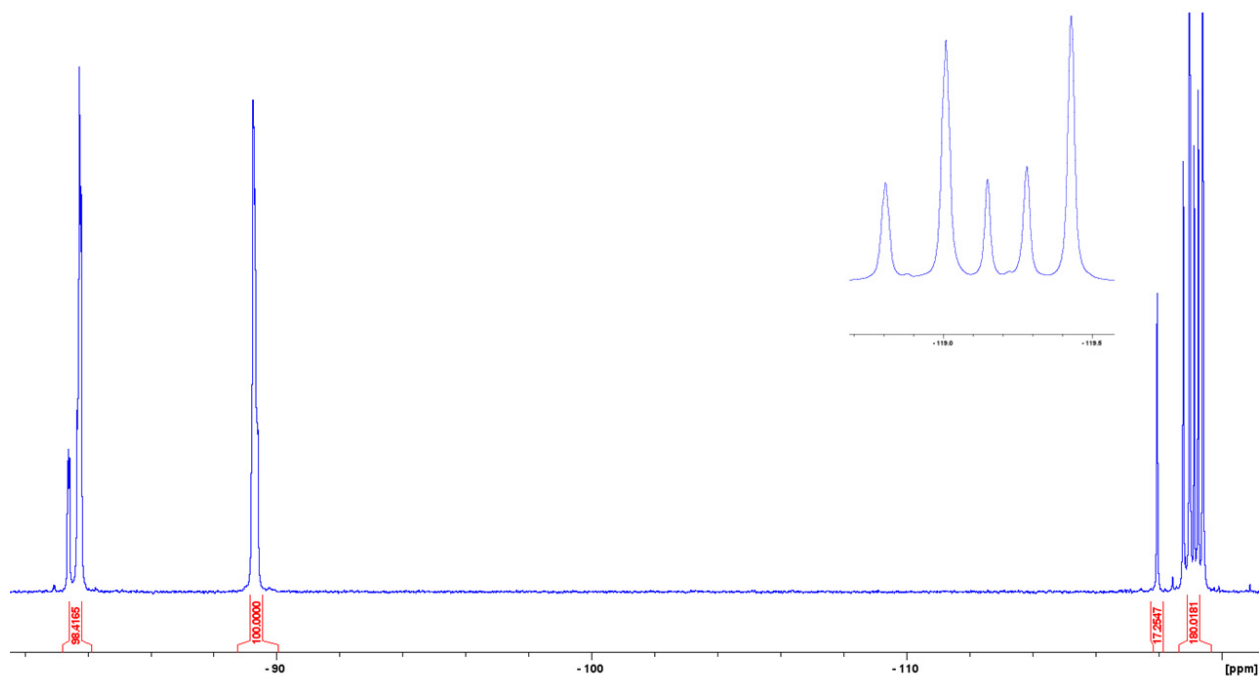

Figure S10: <sup>19</sup>F-NMR spectrum of ICH<sub>2</sub>CH<sub>2</sub>CF<sub>2</sub>CF<sub>2</sub>OCF<sub>2</sub>CF<sub>2</sub>SO<sub>3</sub>H recorded in d<sub>6</sub>-acetone.
